# Supplementary material for: Human dietary intake and excretion of dioxin-like compounds
Source: Royal Society of Chemistry journal article supplement (doi:10.1039/b211406b), 2003-01-23
Supplement: tables.doc [file tables.doc]

# supplemental material for HARRAD et al

# HUMAN DIETARY INTAKE AND EXCRETION OF DIOXIN-LIKE COMPOUNDS

# Summary of Younger Group’s Weight, Food Intake and Faecal Excretion

| **Parameter/Subject No.** | **2** | **3** | **4** | **6** | **7** | **8** | **9** |
| --- | --- | --- | --- | --- | --- | --- | --- |
| Age (years) | 22 | 26 | 21 | 18 | 30 | 21 | 29 |
| Weight at start of normal diet trial (kg) | 72.5 | 74.0 | 72.4 | 72.1 | 56.8 | 76.1 | 73.4 |
| Weight changea during normal diet trial (kg) | 0.2 | -0.1 | 0.9 | -0.3 | 0.1 | 0.4 | 1.2 |
| Weight changea during vegan diet trial (kg) | -1.0 | -0.9 | 0.6 | -0.8 | 1.2 | 1.0 | -0.5 |
| Body Mass Indexb (kg/m2) | 23.7 | 24.4 | 23.7 | 23.0 | 18.6 | 22.3 | 25.7 |
| Dry weight food ingested during normal diet trial (kg/week) | 4.86 | 3.56 | 5.36 | 3.76 | 3.10 | 5.62 | 6.35 |
| Dry weight faeces excreted during normal diet trial (kg/week) | 0.295 | 0.404 | 0.212 | 0.361 | 0.104 | 0.291 | 0.234 |
| Dry weight food ingested during vegan diet trial (kg/week) | 5.02 | 3.40 | 4.34 | 3.08 | 3.83 | 5.89 | 4.76 |
| Dry weight faeces excreted during vegan diet trial (kg/week) | 0.358 | 0.245 | 0.228 | 0.243 | 0.266 | 0.390 | 0.398 |

a negative values indicate a weight loss

b taken as body mass index at start of week 1 (normal diet trial)

# Summary of Older Group’s Weight, Food Intake and Faecal Excretion

| **Parameter/Subject No.** | **1** | **3** | **4** | **5** | **6** | **7** | **8** |
| --- | --- | --- | --- | --- | --- | --- | --- |
| Age (years) | 54 | 46 | 52 | 45 | 46 | 45 | 58 |
| Weight at start of normal diet trial (kg) | 67.5 | 74.2 | 64.5 | 78.9 | 58.9 | 80.7 | 74.2 |
| Weight changea during normal diet trial (kg) | 0.2 | -0.8 | -1.5 | -1.0 | 0.4 | -1.8 | -0.1 |
| Weight changea during vegan diet trial (kg) | 0.5 | -1.8 | -0.4 | -1.1 | 0.0 | -0.4 | 0.5 |
| Body Mass Indexb (kg/m2) | 23.1 | 27.3 | 20.8 | 25.8 | 21.1 | 23.1 | 21.4 |
| Dry weight food ingested during normal diet trial (kg/week) | 2.82 | 4.95 | 4.16 | 4.45 | 4.21 | 2.88 | 4.86 |
| Dry weight faeces excreted during normal diet trial (kg/week) | 0.141 | 0.134 | 0.287 | 0.379 | 0.308 | 0.213 | 0.299 |
| Dry weight food ingested during vegan diet trial (kg/week) | 3.27 | 2.93 | 4.10 | 4.72 | 3.25 | 3.48 | 5.35 |
| Dry weight faeces excreted during vegan diet trial (kg/week) | 0.203 | 0.152 | 0.257 | 0.386 | 0.229 | 0.218 | 0.269 |

a negative values indicate a weight loss

b taken as body mass index at start of week 1 (normal diet trial)

# Summary of Accuracy and Precision Data for PCBs other than #s 77, 126, and 169

| **Congener**  **Number** | **CRM 392 Certified**  **Concentration**  **g kg-1 (n-1)** | **CRM 392 Experimental Mean**  **Concentration**  **g kg-1 (n-1)** | **CRM450 Certified**  **Concentration**  **g kg-1 (n-1)** | **CRM 450 Experimental Mean**  **Concentration**  **g kg-1 (n-1)** | **IAEA 351 Certified**  **Concentration**  **g kg-1 (range)** | **IAEA 351 Experimental Mean**  **Concentration**  **g kg-1 (n-1)** | **NIST 1941a Certified**  **Concentration**  **g kg-1 (n-1)** | **NIST 1941a Experimental Mean**  **Concentration**  **g kg-1 (n-1)** |
| --- | --- | --- | --- | --- | --- | --- | --- | --- |
| 28 | 100 (10) | 98.4 (15.9) | - | - | - | - | - | - |
| 49 | - | - | - | - | - | - | 8.04 (0.62) | 8.0 (1.0) |
| 52 | 70 (9) | 80.6 (7.8) | 1.16 (0.17) | 0.85 (0.08) | - | - | 6.89 (0.50) | 7.4 (0.68) |
| 99 | - | - | - | - | - | - | 4.30 (0.32) | 3.7 (1.1) |
| 101 | 134 (11) | 142.3 (11.5) | - | - | 21 (15.4-26.6) | 20 (4.0) | 10.1 (0.62) | 11.5 (0.55) |
| 105 | - | - | - | - | - | - | 3.61 (0.40) | 3.0 (0.72) |
| 118 | 97 (12) | 104.6 (8.6) | 3.3 (0.4) | 2.89 (0.73) | 38 (10-66) | 35 (4.2) | 9.38 (0.79) | 8.9 (0.64) |
| 128 | - | - | - | - | - | - | 1.64 (0.25) | 2.3 (0.53) |
| 138 | - | - | - | - | 110 (94-126) | 93 (7.7) | 13.07 (0.61) | 11.7 (1.0) |
| 153 | 288 (18) | 262.6 (9.3) | 19.0 (0.7) | 23.3 (0.62) | 160 (145-175) | 130 (10.4) | 17.31 (0.83) | 16.6 (0.68) |
| 156 | - | - | 1.62 (0.2) | 1.20 (0.17) | - | - | 1.03 (0.07) | <1.0 (-) |
| 180 | 313 (24) | 310.4 (13.5) | 11.0 (0.7) | 12.7 (0.76) | 88 (69-107) | 79 (15.8) | 6.06 (0.49) | 5.8 (0.64) |

CRM 392 = Sewage Sludge (6 replicates); CRM 450 = Natural Milk Powder (4 replicates); IAEA 351 = Tuna Homogenate (5 replicates); NIST 1941a = Marine Sediment (5 replicates)

**Summary of Higher End Daily Dietary Intake Data for Younger Subjects (Lower end estimates in parentheses)**

|  | **PCDD/Fs (pg WHOTEQ kg bw/d)** | | | | | **PCBs (pg WHOTEQ/kg bw/d)** | | | | **PCDD/Fs + PCBs (pg WHOTEQ/kg bw/d)** | | | | **PCBs g PCB/person/d)** | | | | | |
| --- | --- | --- | --- | --- | --- | --- | --- | --- | --- | --- | --- | --- | --- | --- | --- | --- | --- | --- | --- |
| **Parameter** | | **Normal Diet** | **Vegan Diet** | | **Normal Diet** | | **Vegan Diet** | | **Normal Diet** | | | **Vegan Diet** | | | **Normal Diet** | | **Vegan Diet** | |  |
| arithmetic mean | | 1.01 (1.00) | 0.059 (0.046) | 0.54 (0.43) | | | | 0.29 (0.21) | | | 1.56 (1.43) | | 0.35 (0.25) | | | 5.01 (5.01) | | 3.30 (3.30) | |
| geometric mean | | 0.62 (0.56) | 0.024 (0.003) | 0.50 (0.37) | | | | 0.25 (0.18) | | | 1.32 (1.16) | | 0.29 (0.20) | | | 4.33 (4.33) | | 3.16 (3.15) | |
| median | | 1.07 (1.05) | 0.016 (0.001) | 0.53 (0.40) | | | | 0.29 (0.19) | | | 1.75 (1.60) | | 0.30 (0.20) | | | 4.75 (4.74) | | 3.30 (3.30) | |
| n-1 | | 0.74 (0.74) | 0.108 (0.109) | 0.22 (0.23) | | | | 0.14 (0.11) | | | 0.83 (0.83) | | 0.21 (0.18) | | | 2.72 (2.72) | | 1.07 (1.07) | |
| Minimum | | 0.04 (0.03) | 0.011 (0.001) | 0.30 (0.16) | | | | 0.07 (0.07) | | | 0.45 (0.32) | | 0.08 (0.07) | | | 1.69 (1.69) | | 1.85 (1.85) | |
| Maximum | | 1.92 (1.91) | 0.280 (0.268) | 0.78 (0.71) | | | | 0.49 (0.36) | | | 2.33 (2.25) | | 0.67 (0.55) | | | 8.85 (8.85) | | 5.05 (5.05) | |

**Summary of Higher End Daily Dietary Intake Data for Older Subjects (Lower end estimates in parentheses)**

|  | **PCDD/Fs (pg WHOTEQ/kg bw/d)** | | | | | **PCBs (pg WHOTEQ/kg bw/d)** | | | | **PCDD/Fs + PCBs (pg WHOTEQ/kg bw/d)** | | | | **PCBs g PCB/person/d)** | | | | | |
| --- | --- | --- | --- | --- | --- | --- | --- | --- | --- | --- | --- | --- | --- | --- | --- | --- | --- | --- | --- |
| **Parameter** | | **Normal Diet** | **Vegan Diet** | | **Normal Diet** | | **Vegan Diet** | | **Normal Diet** | | | **Vegan Diet** | | | **Normal Diet** | | **Vegan Diet** | |  |
| arithmetic mean | | 0.34 (0.13) | 0.23 (0.02) | 0.81 (0.40) | | | | 0.46 (0.02) | | | 1.15 (0.53) | | 0.70 (0.04) | | | 0.99 (0.99) | | 0.18 (0.18) | |
| geometric mean | | 0.31 (0.05) | 0.22 (0.02) | 0.75 (0.14) | | | | 0.45 (0.01) | | | 1.08 (0.25) | | 0.67 (0.04) | | | 0.54 (0.55) | | 0.14 (0.13) | |
| median | | 0.27 (0.02) | 0.19 (0.02) | 0.75 (0.08) | | | | 0.49 (0.01) | | | 1.01 (0.16) | | 0.68 (0.03) | | | 0.32 (0.32) | | 0.11 (0.11) | |
| n-1 | | 0.19 (0.22) | 0.10 (0.01) | 0.32 (0.49) | | | | 0.12 (0.02) | | | 0.47 (0.67) | | 0.20 (0.03) | | | 1.02 (1.01) | | 0.16 (0.16) | |
| Minimum | | 0.20 (0.01) | 0.13 (0.01) | 0.47 (0.02) | | | | 0.33 (0.00) | | | 0.70 (0.03) | | 0.45 (0.02) | | | 0.13 (0.13) | | 0.05 (0.04) | |
| Maximum | | 0.72 (0.63) | 0.37 (0.03) | 1.28 (1.25) | | | | 0.63 (0.07) | | | 2.00 (1.88) | | 0.96 (0.09) | | | 2.59 (2.59) | | 0.51 (0.51) | |

**Comparison of Dietary Intake and Excretion (ng/d for PCDD/Fs; g/d for PCBs) both Trials (Subject 9, Younger Group)**

| **Congener** | **IND** | **ILDD** | **END** | **ELDD** |
| --- | --- | --- | --- | --- |
| 2,3,7,8-TCDD | 0.031 | 0.0002 | 0.002 | 0.006 |
| 1,2,3,7,8-PeCDD | 0.00054 | 0.00041 | 0.005 | 0.000 |
| 1,2,3,6,7,8-HxCDD | 0.00045 | 0.00034 | 0.031 | 0.057 |
| 1,2,3,4,7,8-HxCDD | 0.00045 | 0.00034 | 0.005 | 0.007 |
| 1,2,3,7,8,9-HxCDD | 0.00054 | 0.00041 | 0.006 | 0.006 |
| 1,2,3,4,6,7,8-HpCDD | 0.19 | 0.0054 | 0.063 | 0.108 |
| OCDD | 1.36 | 0.88 | 0.83 | 1.37 |
| 2,3,7,8-TCDF | 0.063 | 0.0002 | 0.001 | 0.003 |
| 2,3,4,7,8-PeCDF | 0.0005 | 0.0034 | 0.012 | 0.022 |
| 1,2,3,4,7,8-HxCDF | 0.038 | 0.00034 | 0.006 | 0.011 |
| 1,2,3,6,7,8-HxCDF | 0.024 | 0.0003 | 0.005 | 0.011 |
| 2,3,4,6,7,8-HxCDF | 0.00045 | 0.00034 | 0.004 | 0.005 |
| 1,2,3,4,6,7,8-HpCDF | 0.199 | 0.00041 | 0.032 | 0.042 |
| OCDF | 4.8 | 0.20 | 0.13 | 0.000 |
| 18 | 0.53 | 0.20 | 0.043 | 0.10 |
| 31 | 1.01 | 0.31 | 0.13 | 0.12 |
| 28 | 2.26 | 0.64 | 0.28 | 0.22 |
| 37 | 0.30 | 0.13 | 0.041 | 0.029 |
| 51 | 0.08 | 0.026 | 0.009 | 0.000 |
| 52 | 1.68 | 0.67 | 0.166 | 0.193 |
| 49 | 0.47 | 0.17 | 0.047 | 0.051 |
| 101 | 1.31 | 0.62 | 0.212 | 0.151 |
| 99 | 0.21 | 0.086 | 0.036 | 0.026 |
| 118 | 0.28 | 0.17 | 0.039 | 0.040 |
| 105 | 0.062 | 0.037 | 0.015 | 0.011 |
| 147 | 0.0001 | 0.0001 | 0.058 | 0.000 |
| 153 | 0.22 | 0.08 | 0.062 | 0.041 |
| 138 | 0.22 | 0.09 | 0.082 | 0.051 |
| 128+167 | 0.0018 | 0.0013 | 0.004 | 0.000 |
| 156 | 0.0034 | 0.0001 | 0.004 | 0.000 |
| 180 | 0.043 | 0.0002 | 0.000 | 0.007 |

N.B. where data not reported for a congener, concentration in faeces was below detection limit in both trials; IND = intake normal diet; ILDD = intake vegan diet; END = excretion normal diet; ELDD = excretion vegan diet

**Comparison of Dietary Intake and Excretion (ng/d for PCDD/Fs; g/d for PCBs) both Trials (Subject 8, Younger Group)**

| Congener | **IND** | **ILDD** | **END** | **ELDD** |
| --- | --- | --- | --- | --- |
| 2,3,7,8-TCDD | 0.022 | 0.000 | 0.004 | 0.000 |
| 1,2,3,7,8-PeCDD | 0.000 | 0.001 | 0.011 | 0.000 |
| 1,2,3,6,7,8-HxCDD | 0.000 | 0.000 | 0.040 | 0.012 |
| 1,2,3,4,7,8-HxCDD | 0.000 | 0.000 | 0.000 | 0.000 |
| 1,2,3,7,8,9-HxCDD | 0.000 | 0.001 | 0.014 | 0.000 |
| 1,2,3,4,6,7,8-HpCDD | 0.257 | 0.001 | 0.072 | 0.036 |
| OCDD | 1.765 | 0.791 | 0.796 | 0.497 |
| 2,3,7,8-TCDF | 0.321 | 0.000 | 0.008 | 0.000 |
| 1,2,3,7,8-PeCDF | 0.104 | 0.001 | 0.000 | 0.000 |
| 2,3,4,7,8-PeCDF | 0.104 | 0.001 | 0.016 | 0.013 |
| 1,2,3,4,7,8-HxCDF | 0.000 | 0.000 | 0.005 | 0.000 |
| 1,2,3,6,7,8-HxCDF | 0.000 | 0.000 | 0.006 | 0.000 |
| 2,3,4,6,7,8-HxCDF | 0.000 | 0.000 | 0.007 | 0.000 |
| 1,2,3,7,8,9-HxCDF | 0.000 | 0.001 | 0.000 | 0.000 |
| 1,2,3,4,6,7,8-HpCDF | 0.000 | 0.001 | 0.035 | 0.022 |
| 1,2,3,4,7,8,9-HpCDF | 0.001 | 0.001 | 0.000 | 0.000 |
| OCDF | 0.385 | 0.001 | 0.000 | 0.000 |
| 18 | 0.380 | 0.242 | 0.043 | 0.100 |
| 31 | 0.425 | 0.455 | 0.088 | 0.140 |
| 28 | 0.947 | 0.917 | 0.211 | 0.315 |
| 37 | 0.122 | 0.229 | 0.029 | 0.000 |
| 51 | 0.033 | 0.041 | 0.011 | 0.056 |
| 52 | 0.654 | 1.044 | 0.213 | 0.340 |
| 49 | 0.175 | 0.278 | 0.055 | 0.089 |
| 47 | 0.053 | 0.093 | 0.035 | 0.029 |
| 81 | 0.000 | 0.000 | 0.000 | 0.000 |
| 77 | 0.003 | 0.011 | 0.000 | 0.000 |
| 101 | 0.444 | 1.052 | 0.195 | 0.250 |
| 99 | 0.080 | 0.152 | 0.031 | 0.044 |
| 123 | 0.000 | 0.000 | 0.000 | 0.000 |
| 118 | 0.109 | 0.215 | 0.036 | 0.060 |
| 114 | 0.002 | 0.000 | 0.000 | 0.000 |
| 105 | 0.030 | 0.048 | 0.011 | 0.020 |
| 126 | 0.000 | 0.000 | 0.000 | 0.000 |
| 147 | 0.000 | 0.000 | 0.000 | 0.035 |
| 153 | 0.104 | 0.125 | 0.046 | 0.063 |
| 138 | 0.133 | 0.144 | 0.049 | 0.087 |
| 128+167 | 0.016 | 0.003 | 0.000 | 0.001 |
| 156 | 0.029 | 0.000 | 0.000 | 0.000 |
| 157 | 0.041 | 0.000 | 0.000 | 0.000 |
| 169 | 0.000 | 0.000 | 0.000 | 0.000 |
| 180 | 0.099 | 0.000 | 0.000 | 0.000 |
| 189 | 0.000 | 0.000 | 0.000 | 0.000 |
| PCB | 3.880 | 5.051 | 2.066 | 1.631 |

IND = intake normal diet; ILDD = intake vegan diet; END = excretion normal diet; ELDD = excretion vegan diet

**Comparison of Dietary Intake and Excretion (ng/d for PCDD/Fs; g/d for PCBs) both Trials (Subject 7, Younger Group)**

| Congener | **IND** | **ILDD** | **END** | **ELDD** |
| --- | --- | --- | --- | --- |
| 2,3,7,8-TCDD | 0.012 | 0.000 | 0.001 | 0.003 |
| 1,2,3,7,8-PeCDD | 0.000 | 0.000 | 0.004 | 0.011 |
| 1,2,3,6,7,8-HxCDD | 0.000 | 0.000 | 0.009 | 0.027 |
| 1,2,3,4,7,8-HxCDD | 0.000 | 0.000 | 0.000 | 0.000 |
| 1,2,3,7,8,9-HxCDD | 0.062 | 0.000 | 0.003 | 0.007 |
| 1,2,3,4,6,7,8-HpCDD | 0.146 | 0.000 | 0.083 | 0.201 |
| OCDD | 1.152 | 0.410 | 0.713 | 1.445 |
| 2,3,7,8-TCDF | 0.044 | 0.000 | 0.002 | 0.007 |
| 1,2,3,7,8-PeCDF | 0.020 | 0.000 | 0.000 | 0.004 |
| 2,3,4,7,8-PeCDF | 0.000 | 0.000 | 0.025 | 0.034 |
| 1,2,3,4,7,8-HxCDF | 0.000 | 0.000 | 0.005 | 0.010 |
| 1,2,3,6,7,8-HxCDF | 0.000 | 0.000 | 0.005 | 0.011 |
| 2,3,4,6,7,8-HxCDF | 0.000 | 0.000 | 0.002 | 0.007 |
| 1,2,3,7,8,9-HxCDF | 0.000 | 0.000 | 0.000 | 0.000 |
| 1,2,3,4,6,7,8-HpCDF | 0.000 | 0.000 | 0.006 | 0.030 |
| 1,2,3,4,7,8,9-HpCDF | 0.000 | 0.000 | 0.000 | 0.000 |
| OCDF | 0.239 | 0.602 | 0.000 | 0.000 |
| 18 | 0.155 | 0.185 | 0.000 | 0.000 |
| 31 | 0.148 | 0.330 | 0.005 | 0.015 |
| 28 | 0.443 | 0.618 | 0.003 | 0.029 |
| 37 | 0.052 | 0.098 | 0.000 | 0.000 |
| 51 | 0.014 | 0.028 | 0.001 | 0.003 |
| 52 | 0.256 | 0.498 | 0.030 | 0.076 |
| 49 | 0.065 | 0.143 | 0.007 | 0.019 |
| 47 | 0.027 | 0.047 | 0.002 | 0.007 |
| 81 | 0.000 | 0.000 | 0.000 | 0.000 |
| 77 | 0.002 | 0.004 | 0.000 | 0.000 |
| 101 | 0.214 | 0.403 | 0.047 | 0.128 |
| 99 | 0.038 | 0.058 | 0.009 | 0.023 |
| 123 | 0.000 | 0.000 | 0.000 | 0.000 |
| 118 | 0.062 | 0.085 | 0.026 | 0.052 |
| 114 | 0.003 | 0.000 | 0.000 | 0.000 |
| 105 | 0.018 | 0.020 | 0.010 | 0.019 |
| 126 | 0.000 | 0.000 | 0.000 | 0.000 |
| 147 | 0.003 | 0.000 | 0.013 | 0.037 |
| 153 | 0.079 | 0.066 | 0.025 | 0.055 |
| 138 | 0.067 | 0.065 | 0.038 | 0.086 |
| 128+167 | 0.009 | 0.001 | 0.002 | 0.005 |
| 156 | 0.007 | 0.000 | 0.002 | 0.003 |
| 157 | 0.002 | 0.000 | 0.000 | 0.002 |
| 169 | 0.000 | 0.000 | 0.000 | 0.000 |
| 180 | 0.028 | 0.012 | 0.000 | 0.000 |
| 189 | 0.000 | 0.000 | 0.000 | 0.000 |
| PCB | 1.692 | 2.661 | 0.221 | 0.557 |

IND = intake normal diet; ILDD = intake vegan diet; END = excretion normal diet; ELDD = excretion vegan diet

**Comparison of Dietary Intake and Excretion (ng/d for PCDD/Fs; g/d for PCBs) both Trials (Subject 6, Younger Group)**

| Congener | **IND** | **ILDD** | **END** | **ELDD** |
| --- | --- | --- | --- | --- |
| 2,3,7,8-TCDD | 0.000 | 0.000 | 0.000 | 0.000 |
| 1,2,3,7,8-PeCDD | 0.000 | 0.000 | 0.000 | 0.000 |
| 1,2,3,6,7,8-HxCDD | 0.000 | 0.000 | 0.018 | 0.016 |
| 1,2,3,4,7,8-HxCDD | 0.000 | 0.000 | 0.000 | 0.000 |
| 1,2,3,7,8,9-HxCDD | 0.075 | 0.000 | 0.000 | 0.010 |
| 1,2,3,4,6,7,8-HpCDD | 0.145 | 0.000 | 0.113 | 0.087 |
| OCDD | 0.913 | 0.400 | 2.061 | 1.213 |
| 2,3,7,8-TCDF | 0.537 | 0.000 | 0.004 | 0.002 |
| 1,2,3,7,8-PeCDF | 0.086 | 0.000 | 0.000 | 0.000 |
| 2,3,4,7,8-PeCDF | 0.118 | 0.000 | 0.008 | 0.008 |
| 1,2,3,4,7,8-HxCDF | 0.102 | 0.000 | 0.000 | 0.000 |
| 1,2,3,6,7,8-HxCDF | 0.000 | 0.000 | 0.000 | 0.000 |
| 2,3,4,6,7,8-HxCDF | 0.017 | 0.000 | 0.000 | 0.000 |
| 1,2,3,7,8,9-HxCDF | 0.000 | 0.000 | 0.000 | 0.000 |
| 1,2,3,4,6,7,8-HpCDF | 0.091 | 0.000 | 0.037 | 0.024 |
| 1,2,3,4,7,8,9-HpCDF | 0.059 | 0.000 | 0.000 | 0.000 |
| OCDF | 0.107 | 2.153 | 0.001 | 0.000 |
| 18 | 0.252 | 0.225 | 0.060 | 0.024 |
| 31 | 0.263 | 0.276 | 0.047 | 0.021 |
| 28 | 0.645 | 0.483 | 0.099 | 0.045 |
| 37 | 0.097 | 0.046 | 0.000 | 0.002 |
| 51 | 0.083 | 0.022 | 0.000 | 0.000 |
| 52 | 0.525 | 0.337 | 0.053 | 0.024 |
| 49 | 0.128 | 0.090 | 0.012 | 0.006 |
| 47 | 0.037 | 0.028 | 0.008 | 0.005 |
| 81 | 0.000 | 0.000 | 0.000 | 0.000 |
| 77 | 0.004 | 0.000 | 0.000 | 0.000 |
| 101 | 0.410 | 0.188 | 0.187 | 0.018 |
| 99 | 0.059 | 0.026 | 0.010 | 0.007 |
| 123 | 0.000 | 0.000 | 0.000 | 0.003 |
| 118 | 0.092 | 0.038 | 0.048 | 0.008 |
| 114 | 0.000 | 0.000 | 0.000 | 0.000 |
| 105 | 0.018 | 0.009 | 0.006 | 0.004 |
| 126 | 0.000 | 0.000 | 0.000 | 0.000 |
| 147 | 0.046 | 0.000 | 0.044 | 0.000 |
| 153 | 0.077 | 0.034 | 0.280 | 0.020 |
| 138 | 0.075 | 0.037 | 0.342 | 0.019 |
| 128+167 | 0.004 | 0.000 | 0.015 | 0.004 |
| 156 | 0.000 | 0.000 | 0.006 | 0.002 |
| 157 | 0.000 | 0.000 | 0.000 | 0.000 |
| 169 | 0.000 | 0.000 | 0.000 | 0.000 |
| 180 | 0.000 | 0.011 | 0.051 | 0.016 |
| 189 | 0.000 | 0.000 | 0.000 | 0.000 |
| PCB | 2.815 | 1.852 | 1.267 | 0.227 |

IND = intake normal diet; ILDD = intake vegan diet; END = excretion normal diet; ELDD = excretion vegan diet

**Comparison of Dietary Intake and Excretion (ng/d for PCDD/Fs; g/d for PCBs) both Trials (Subject 4, Younger Group)**

| Congener | **IND** | **ILDD** | **END** | **ELDD** |
| --- | --- | --- | --- | --- |
| 2,3,7,8-TCDD | 0.000 | 0.000 | 0.000 | 0.000 |
| 1,2,3,7,8-PeCDD | 0.000 | 0.000 | 0.000 | 0.000 |
| 1,2,3,6,7,8-HxCDD | 0.000 | 0.000 | 0.009 | 0.018 |
| 1,2,3,4,7,8-HxCDD | 0.000 | 0.000 | 0.004 | 0.000 |
| 1,2,3,7,8,9-HxCDD | 0.000 | 0.000 | 0.000 | 0.005 |
| 1,2,3,4,6,7,8-HpCDD | 0.383 | 0.000 | 0.045 | 0.046 |
| OCDD | 16.084 | 0.267 | 0.754 | 1.008 |
| 2,3,7,8-TCDF | 0.000 | 0.000 | 0.000 | 0.002 |
| 1,2,3,7,8-PeCDF | 0.000 | 0.000 | 0.000 | 0.000 |
| 2,3,4,7,8-PeCDF | 0.000 | 0.000 | 0.005 | 0.011 |
| 1,2,3,4,7,8-HxCDF | 0.000 | 0.000 | 0.004 | 0.004 |
| 1,2,3,6,7,8-HxCDF | 0.000 | 0.000 | 0.003 | 0.003 |
| 2,3,4,6,7,8-HxCDF | 0.000 | 0.000 | 0.003 | 0.004 |
| 1,2,3,7,8,9-HxCDF | 0.000 | 0.000 | 0.000 | 0.000 |
| 1,2,3,4,6,7,8-HpCDF | 0.000 | 0.000 | 0.030 | 0.017 |
| 1,2,3,4,7,8,9-HpCDF | 0.001 | 0.000 | 0.006 | 0.000 |
| OCDF | 0.322 | 0.521 | 0.452 | 0.055 |
| 18 | 0.572 | 0.352 | 0.004 | 0.014 |
| 31 | 0.739 | 0.561 | 0.104 | 0.028 |
| 28 | 1.762 | 0.993 | 0.097 | 0.052 |
| 37 | 0.157 | 0.111 | 0.097 | 0.000 |
| 51 | 0.051 | 0.044 | 0.000 | 0.000 |
| 52 | 0.820 | 0.683 | 0.077 | 0.053 |
| 49 | 0.236 | 0.182 | 0.020 | 0.014 |
| 47 | 0.080 | 0.056 | 0.010 | 0.010 |
| 81 | 0.000 | 0.000 | 0.000 | 0.000 |
| 77 | 0.006 | 0.002 | 0.000 | 0.000 |
| 101 | 0.549 | 0.380 | 0.162 | 0.068 |
| 99 | 0.094 | 0.052 | 0.047 | 0.015 |
| 123 | 0.000 | 0.000 | 0.000 | 0.000 |
| 118 | 0.156 | 0.074 | 0.064 | 0.031 |
| 114 | 0.000 | 0.000 | 0.000 | 0.000 |
| 105 | 0.037 | 0.020 | 0.043 | 0.009 |
| 126 | 0.000 | 0.000 | 0.000 | 0.000 |
| 147 | 0.000 | 0.000 | 0.000 | 0.003 |
| 153 | 0.149 | 0.052 | 0.085 | 0.046 |
| 138 | 0.159 | 0.061 | 0.090 | 0.059 |
| 128+167 | 0.005 | 0.000 | 0.041 | 0.001 |
| 156 | 0.003 | 0.000 | 0.023 | 0.002 |
| 157 | 0.000 | 0.000 | 0.025 | 0.000 |
| 169 | 0.000 | 0.000 | 0.000 | 0.000 |
| 180 | 0.037 | 0.023 | 0.043 | 0.012 |
| 189 | 0.000 | 0.000 | 0.000 | 0.000 |
| PCB | 5.611 | 3.648 | 1.030 | 0.419 |

IND = intake normal diet; ILDD = intake vegan diet; END = excretion normal diet; ELDD = excretion vegan diet

**Comparison of Dietary Intake and Excretion (ng/d for PCDD/Fs; g/d for PCBs) both Trials (Subject 3, Younger Group)**

| Congener | **IND** | **ILDD** | **END** | **ELDD** |
| --- | --- | --- | --- | --- |
| 2,3,7,8-TCDD | 0.000 | 0.000 | 0.000 | 0.000 |
| 1,2,3,7,8-PeCDD | 0.000 | 0.000 | 0.000 | 0.000 |
| 1,2,3,6,7,8-HxCDD | 0.000 | 0.000 | 0.011 | 0.013 |
| 1,2,3,4,7,8-HxCDD | 0.000 | 0.000 | 0.000 | 0.000 |
| 1,2,3,7,8,9-HxCDD | 0.763 | 0.000 | 0.000 | 0.000 |
| 1,2,3,4,6,7,8-HpCDD | 0.270 | 0.000 | 0.055 | 0.059 |
| OCDD | 1.272 | 0.485 | 0.809 | 0.980 |
| 2,3,7,8-TCDF | 0.153 | 0.000 | 0.003 | 0.004 |
| 1,2,3,7,8-PeCDF | 0.016 | 0.000 | 0.000 | 0.000 |
| 2,3,4,7,8-PeCDF | 0.049 | 0.000 | 0.020 | 0.014 |
| 1,2,3,4,7,8-HxCDF | 0.000 | 0.000 | 0.000 | 0.000 |
| 1,2,3,6,7,8-HxCDF | 0.000 | 0.000 | 0.000 | 0.000 |
| 2,3,4,6,7,8-HxCDF | 0.000 | 0.000 | 0.000 | 0.000 |
| 1,2,3,7,8,9-HxCDF | 0.000 | 0.000 | 0.000 | 0.000 |
| 1,2,3,4,6,7,8-HpCDF | 0.000 | 0.000 | 0.000 | 0.015 |
| 1,2,3,4,7,8,9-HpCDF | 0.000 | 0.000 | 0.000 | 0.000 |
| OCDF | 0.001 | 0.001 | 0.000 | 0.000 |
| 18 | 0.247 | 0.206 | 0.120 | 0.059 |
| 31 | 0.579 | 0.405 | 0.169 | 0.071 |
| 28 | 1.277 | 0.698 | 0.339 | 0.165 |
| 37 | 0.245 | 0.112 | 0.032 | 0.020 |
| 51 | 0.032 | 0.035 | 0.000 | 0.000 |
| 52 | 1.868 | 0.660 | 0.246 | 0.122 |
| 49 | 0.319 | 0.185 | 0.062 | 0.032 |
| 47 | 0.095 | 0.061 | 0.021 | 0.010 |
| 81 | 0.000 | 0.000 | 0.000 | 0.000 |
| 77 | 0.003 | 0.006 | 0.000 | 0.000 |
| 101 | 1.354 | 0.538 | 0.166 | 0.125 |
| 99 | 0.270 | 0.079 | 0.030 | 0.023 |
| 123 | 0.000 | 0.000 | 0.000 | 0.000 |
| 118 | 0.404 | 0.114 | 0.065 | 0.043 |
| 114 | 0.002 | 0.000 | 0.000 | 0.000 |
| 105 | 0.118 | 0.030 | 0.015 | 0.011 |
| 126 | 0.000 | 0.000 | 0.000 | 0.000 |
| 147 | 0.000 | 0.000 | 0.000 | 0.000 |
| 153 | 0.167 | 0.079 | 0.157 | 0.109 |
| 138 | 0.205 | 0.084 | 0.124 | 0.092 |
| 128+167 | 0.011 | 0.002 | 0.002 | 0.002 |
| 156 | 0.000 | 0.000 | 0.008 | 0.006 |
| 157 | 0.000 | 0.000 | 0.000 | 0.000 |
| 169 | 0.000 | 0.000 | 0.000 | 0.000 |
| 180 | 0.012 | 0.013 | 0.102 | 0.067 |
| 189 | 0.000 | 0.000 | 0.000 | 0.000 |
| PCB | 7.208 | 3.308 | 1.657 | 0.957 |

IND = intake normal diet; ILDD = intake vegan diet; END = excretion normal diet; ELDD = excretion vegan diet

**Comparison of Dietary Intake and Excretion (ng/d for PCDD/Fs; g/d for PCBs) both Trials (Subject 2, Younger Group)**

| Congener | **IND** | **ILDD** | **END** | **ELDD** |
| --- | --- | --- | --- | --- |
| 2,3,7,8-TCDD | 0.000 | 0.000 | 0.000 | 0.000 |
| 1,2,3,7,8-PeCDD | 0.000 | 0.000 | 0.000 | 0.000 |
| 1,2,3,6,7,8-HxCDD | 0.000 | 0.000 | 0.008 | 0.009 |
| 1,2,3,4,7,8-HxCDD | 0.000 | 0.000 | 0.000 | 0.000 |
| 1,2,3,7,8,9-HxCDD | 0.000 | 0.000 | 0.003 | 0.000 |
| 1,2,3,4,6,7,8-HpCDD | 0.180 | 0.100 | 0.051 | 0.051 |
| OCDD | 1.595 | 0.788 | 0.758 | 0.480 |
| 2,3,7,8-TCDF | 0.000 | 0.358 | 0.002 | 0.003 |
| 1,2,3,7,8-PeCDF | 0.000 | 0.129 | 0.000 | 0.000 |
| 2,3,4,7,8-PeCDF | 0.000 | 0.129 | 0.005 | 0.008 |
| 1,2,3,4,7,8-HxCDF | 0.000 | 0.072 | 0.003 | 0.005 |
| 1,2,3,6,7,8-HxCDF | 0.000 | 0.000 | 0.002 | 0.004 |
| 2,3,4,6,7,8-HxCDF | 0.000 | 0.000 | 0.002 | 0.006 |
| 1,2,3,7,8,9-HxCDF | 0.000 | 0.000 | 0.000 | 0.000 |
| 1,2,3,4,6,7,8-HpCDF | 0.000 | 0.000 | 0.022 | 0.027 |
| 1,2,3,4,7,8,9-HpCDF | 0.001 | 0.001 | 0.000 | 0.000 |
| OCDF | 0.694 | 0.001 | 0.316 | 0.000 |
| 18 | 0.259 | 0.315 | 0.043 | 0.100 |
| 31 | 0.386 | 0.476 | 0.134 | 0.119 |
| 28 | 0.756 | 0.924 | 0.280 | 0.223 |
| 37 | 0.082 | 0.185 | 0.041 | 0.029 |
| 51 | 0.027 | 0.148 | 0.009 | 0.000 |
| 52 | 0.460 | 0.989 | 0.166 | 0.193 |
| 49 | 0.126 | 0.254 | 0.047 | 0.051 |
| 47 | 0.042 | 0.081 | 0.030 | 0.016 |
| 81 | 0.000 | 0.000 | 0.000 | 0.000 |
| 77 | 0.003 | 0.008 | 0.000 | 0.000 |
| 101 | 0.390 | 0.774 | 0.212 | 0.151 |
| 99 | 0.066 | 0.095 | 0.036 | 0.026 |
| 123 | 0.000 | 0.000 | 0.000 | 0.000 |
| 118 | 0.129 | 0.168 | 0.039 | 0.040 |
| 114 | 0.000 | 0.003 | 0.000 | 0.000 |
| 105 | 0.034 | 0.016 | 0.015 | 0.011 |
| 126 | 0.000 | 0.000 | 0.000 | 0.000 |
| 147 | 0.000 | 0.000 | 0.058 | 0.000 |
| 153 | 0.119 | 0.066 | 0.062 | 0.041 |
| 138 | 0.135 | 0.082 | 0.062 | 0.051 |
| 128+167 | 0.000 | 0.000 | 0.082 | 0.001 |
| 156 | 0.000 | 0.000 | 0.004 | 0.000 |
| 157 | 0.000 | 0.000 | 0.000 | 0.000 |
| 169 | 0.000 | 0.000 | 0.000 | 0.000 |
| 180 | 0.026 | 0.000 | 0.000 | 0.007 |
| 189 | 0.000 | 0.000 | 0.000 | 0.000 |
| PCB | 3.042 | 4.585 | 1.321 | 1.060 |

IND = intake normal diet; ILDD = intake vegan diet; END = excretion normal diet; ELDD = excretion vegan diet

**Comparison of Dietary Intake and Excretion (ng/d for PCDD/Fs; g/d for PCBs) both Trials (Subject 8, Older Group)**

| Congener | **IND** | **ILDD** | **END** | **ELDD** |
| --- | --- | --- | --- | --- |
| 2,3,7,8-TCDD | 0.005 | 0.006 | 0.006 | 0.012 |
| 1,2,3,7,8-PeCDD | 0.005 | 0.006 | 0.018 | 0.029 |
| 1,2,3,6,7,8-HxCDD | 0.005 | 0.006 | 0.086 | 0.104 |
| 1,2,3,4,7,8-HxCDD | 0.005 | 0.006 | 0.019 | 0.027 |
| 1,2,3,7,8,9-HxCDD | 0.005 | 0.006 | 0.033 | 0.013 |
| 1,2,3,4,6,7,8-HpCDD | 0.083 | 0.092 | 0.086 | 0.096 |
| OCDD | 0.832 | 1.223 | 1.753 | 1.808 |
| 2,3,7,8-TCDF | 0.064 | 0.008 | 0.002 | 0.004 |
| 1,2,3,7,8-PeCDF | 0.006 | 0.007 | 0.000 | 0.002 |
| 2,3,4,7,8-PeCDF | 0.006 | 0.007 | 0.035 | 0.046 |
| 1,2,3,4,7,8-HxCDF | 0.007 | 0.006 | 0.012 | 0.000 |
| 1,2,3,6,7,8-HxCDF | 0.007 | 0.006 | 0.011 | 0.000 |
| 2,3,4,6,7,8-HxCDF | 0.007 | 0.006 | 0.003 | 0.000 |
| 1,2,3,7,8,9-HxCDF | 0.015 | 0.013 | 0.001 | 0.000 |
| 1,2,3,4,6,7,8-HpCDF | 0.076 | 0.107 | 0.014 | 0.119 |
| 1,2,3,4,7,8,9-HpCDF | 0.017 | 0.015 | 0.000 | 0.009 |
| OCDF | 0.090 | 0.122 | 0.032 | 6.541 |
| 18 | 0.023 | 0.029 | 0.000 | 0.000 |
| 31 | 0.010 | 0.039 | 0.071 | 0.021 |
| 28 | 0.026 | 0.073 | 0.087 | 0.059 |
| 37 | 0.000 | 0.000 | 0.000 | 0.000 |
| 51 | 0.000 | 0.006 | 0.000 | 0.000 |
| 52 | 0.009 | 0.041 | 0.348 | 0.126 |
| 49 | 0.000 | 0.011 | 0.091 | 0.042 |
| 47 | 0.000 | 0.006 | 0.055 | 0.063 |
| 81 | 0.000 | 0.000 | 0.000 | 0.000 |
| 77 | 0.005 | 0.001 | 0.001 | 0.001 |
| 101 | 0.006 | 0.046 | 0.045 | 0.034 |
| 99 | 0.000 | 0.006 | 0.042 | 0.038 |
| 123 | 0.000 | 0.000 | 0.000 | 0.000 |
| 118 | 0.013 | 0.011 | 0.005 | 0.018 |
| 114 | 0.000 | 0.007 | 0.000 | 0.000 |
| 105 | 0.000 | 0.002 | 0.055 | 0.019 |
| 126 | 0.000 | 0.000 | 0.000 | 0.000 |
| 147 | 0.000 | 0.000 | 0.000 | 0.000 |
| 153 | 0.010 | 0.005 | 0.177 | 0.144 |
| 138 | 0.028 | 0.006 | 0.016 | 0.077 |
| 128+167 | 0.000 | 0.000 | 0.000 | 0.000 |
| 156 | 0.000 | 0.000 | 0.002 | 0.000 |
| 157 | 0.000 | 0.000 | 0.000 | 0.000 |
| 169 | 0.000 | 0.000 | 0.000 | 0.000 |
| 180 | 0.000 | 0.000 | 0.000 | 0.000 |
| 189 | 0.000 | 0.000 | 0.000 | 0.000 |
| PCB | 0.134 | 0.291 | 0.996 | 0.642 |

IND = intake normal diet; ILDD = intake vegan diet; END = excretion normal diet; ELDD = excretion vegan diet

**Comparison of Dietary Intake and Excretion (ng/d for PCDD/Fs; g/d for PCBs) both Trials (Subject 7, Older Group)**

| Congener | **IND** | **ILDD** | **END** | **ELDD** |
| --- | --- | --- | --- | --- |
| 2,3,7,8-TCDD | 0.003 | 0.004 | 0.004 | 0.003 |
| 1,2,3,7,8-PeCDD | 0.003 | 0.004 | 0.012 | 0.009 |
| 1,2,3,6,7,8-HxCDD | 0.003 | 0.003 | 0.041 | 0.053 |
| 1,2,3,4,7,8-HxCDD | 0.003 | 0.003 | 0.009 | 0.008 |
| 1,2,3,7,8,9-HxCDD | 0.003 | 0.003 | 0.014 | 0.011 |
| 1,2,3,4,6,7,8-HpCDD | 0.058 | 0.055 | 0.092 | 0.093 |
| OCDD | 0.617 | 0.746 | 1.211 | 1.584 |
| 2,3,7,8-TCDF | 0.095 | 0.005 | 0.003 | 0.002 |
| 1,2,3,7,8-PeCDF | 0.015 | 0.004 | 0.001 | 0.000 |
| 2,3,4,7,8-PeCDF | 0.070 | 0.004 | 0.015 | 0.015 |
| 1,2,3,4,7,8-HxCDF | 0.027 | 0.004 | 0.006 | 0.007 |
| 1,2,3,6,7,8-HxCDF | 0.013 | 0.004 | 0.005 | 0.006 |
| 2,3,4,6,7,8-HxCDF | 0.003 | 0.004 | 0.002 | 0.003 |
| 1,2,3,7,8,9-HxCDF | 0.006 | 0.007 | 0.000 | 0.002 |
| 1,2,3,4,6,7,8-HpCDF | 0.086 | 0.080 | 0.010 | 0.021 |
| 1,2,3,4,7,8,9-HpCDF | 0.009 | 0.008 | 0.000 | 0.004 |
| OCDF | 0.115 | 0.144 | 0.012 | 0.180 |
| 18 | 0.008 | 0.007 | 0.020 | 0.000 |
| 31 | 0.008 | 0.007 | 0.031 | 0.020 |
| 28 | 0.016 | 0.015 | 0.078 | 0.072 |
| 37 | 0.002 | 0.000 | 0.000 | 0.000 |
| 51 | 0.000 | 0.000 | 0.000 | 0.000 |
| 52 | 0.014 | 0.008 | 0.046 | 0.158 |
| 49 | 0.003 | 0.000 | 0.013 | 0.043 |
| 47 | 0.000 | 0.000 | 0.009 | 0.030 |
| 81 | 0.000 | 0.000 | 0.000 | 0.000 |
| 77 | 0.003 | 0.001 | 0.001 | 0.001 |
| 101 | 0.017 | 0.005 | 0.061 | 0.041 |
| 99 | 0.009 | 0.000 | 0.016 | 0.014 |
| 123 | 0.000 | 0.000 | 0.001 | 0.000 |
| 118 | 0.013 | 0.002 | 0.031 | 0.023 |
| 114 | 0.002 | 0.000 | 0.002 | 0.002 |
| 105 | 0.007 | 0.000 | 0.012 | 0.007 |
| 126 | 0.001 | 0.000 | 0.000 | 0.000 |
| 147 | 0.002 | 0.000 | 0.000 | 0.000 |
| 153 | 0.035 | 0.000 | 0.102 | 0.015 |
| 138 | 0.043 | 0.000 | 0.095 | 0.125 |
| 128+167 | 0.008 | 0.000 | 0.005 | 0.002 |
| 156 | 0.002 | 0.000 | 0.000 | 0.001 |
| 157 | 0.000 | 0.000 | 0.000 | 0.001 |
| 169 | 0.000 | 0.000 | 0.000 | 0.000 |
| 180 | 0.022 | 0.000 | 0.000 | 0.099 |
| 189 | 0.021 | 0.000 | 0.000 | 0.000 |
| PCB | 0.237 | 0.046 | 0.522 | 0.655 |

IND = intake normal diet; ILDD = intake vegan diet; END = excretion normal diet; ELDD = excretion vegan diet

**Comparison of Dietary Intake and Excretion (ng/d for PCDD/Fs; g/d for PCBs) both Trials (Subject 6, Older Group)**

| Congener | **IND** | **ILDD** | **END** | **ELDD** |
| --- | --- | --- | --- | --- |
| 2,3,7,8-TCDD | 0.004 | 0.003 | 0.002 | 0.002 |
| 1,2,3,7,8-PeCDD | 0.004 | 0.003 | 0.006 | 0.007 |
| 1,2,3,6,7,8-HxCDD | 0.004 | 0.003 | 0.022 | 0.026 |
| 1,2,3,4,7,8-HxCDD | 0.004 | 0.003 | 0.000 | 0.003 |
| 1,2,3,7,8,9-HxCDD | 0.004 | 0.003 | 0.000 | 0.003 |
| 1,2,3,4,6,7,8-HpCDD | 0.090 | 0.032 | 0.039 | 0.043 |
| OCDD | 0.517 | 0.279 | 0.704 | 0.655 |
| 2,3,7,8-TCDF | 0.005 | 0.004 | 0.001 | 0.002 |
| 1,2,3,7,8-PeCDF | 0.004 | 0.003 | 0.000 | 0.001 |
| 2,3,4,7,8-PeCDF | 0.004 | 0.003 | 0.011 | 0.009 |
| 1,2,3,4,7,8-HxCDF | 0.005 | 0.004 | 0.004 | 0.002 |
| 1,2,3,6,7,8-HxCDF | 0.005 | 0.004 | 0.003 | 0.002 |
| 2,3,4,6,7,8-HxCDF | 0.005 | 0.004 | 0.002 | 0.002 |
| 1,2,3,7,8,9-HxCDF | 0.010 | 0.007 | 0.001 | 0.005 |
| 1,2,3,4,6,7,8-HpCDF | 0.011 | 0.046 | 0.004 | 0.062 |
| 1,2,3,4,7,8,9-HpCDF | 0.014 | 0.009 | 0.001 | 0.015 |
| OCDF | 0.032 | 0.051 | 0.029 | 0.393 |
| 18 | 0.037 | 0.178 | 0.004 | 0.000 |
| 31 | 0.036 | 0.082 | 0.027 | 0.013 |
| 28 | 0.090 | 0.121 | 0.074 | 0.029 |
| 37 | 0.000 | 0.000 | 0.000 | 0.000 |
| 51 | 0.000 | 0.008 | 0.000 | 0.000 |
| 52 | 0.193 | 0.048 | 0.169 | 0.025 |
| 49 | 0.036 | 0.016 | 0.048 | 0.007 |
| 47 | 0.002 | 0.009 | 0.042 | 0.005 |
| 81 | 0.000 | 0.000 | 0.000 | 0.000 |
| 77 | 0.001 | 0.001 | 0.000 | 0.000 |
| 101 | 0.341 | 0.024 | 0.039 | 0.048 |
| 99 | 0.084 | 0.003 | 0.014 | 0.011 |
| 123 | 0.000 | 0.000 | 0.001 | 0.001 |
| 118 | 0.194 | 0.004 | 0.029 | 0.020 |
| 114 | 0.000 | 0.003 | 0.001 | 0.000 |
| 105 | 0.050 | 0.001 | 0.005 | 0.006 |
| 126 | 0.000 | 0.000 | 0.000 | 0.000 |
| 147 | 0.000 | 0.000 | 0.000 | 0.000 |
| 153 | 0.317 | 0.004 | 0.179 | 0.097 |
| 138 | 0.466 | 0.004 | 0.133 | 0.073 |
| 128+167 | 0.000 | 0.000 | 0.002 | 0.002 |
| 156 | 0.003 | 0.000 | 0.000 | 0.000 |
| 157 | 0.000 | 0.000 | 0.000 | 0.000 |
| 169 | 0.000 | 0.000 | 0.000 | 0.000 |
| 180 | 0.087 | 0.000 | 0.000 | 0.000 |
| 189 | 0.019 | 0.000 | 0.000 | 0.000 |
| PCB | 1.958 | 0.509 | 0.769 | 0.338 |

IND = intake normal diet; ILDD = intake vegan diet; END = excretion normal diet; ELDD = excretion vegan diet

**Comparison of Dietary Intake and Excretion (ng/d for PCDD/Fs; g/d for PCBs) both Trials (Subject 5, Older Group)**

| Congener | **IND** | **ILDD** | **END** | **ELDD** |
| --- | --- | --- | --- | --- |
| 2,3,7,8-TCDD | 0.005 | 0.006 | 0.008 | 0.014 |
| 1,2,3,7,8-PeCDD | 0.005 | 0.007 | 0.016 | 0.035 |
| 1,2,3,6,7,8-HxCDD | 0.005 | 0.011 | 0.086 | 0.127 |
| 1,2,3,4,7,8-HxCDD | 0.005 | 0.011 | 0.092 | 0.003 |
| 1,2,3,7,8,9-HxCDD | 0.005 | 0.011 | 0.007 | 0.003 |
| 1,2,3,4,6,7,8-HpCDD | 0.053 | 0.063 | 0.168 | 0.149 |
| OCDD | 0.700 | 0.566 | 1.405 | 1.049 |
| 2,3,7,8-TCDF | 0.005 | 0.008 | 0.000 | 0.006 |
| 1,2,3,7,8-PeCDF | 0.005 | 0.007 | 0.000 | 0.002 |
| 2,3,4,7,8-PeCDF | 0.005 | 0.007 | 0.026 | 0.055 |
| 1,2,3,4,7,8-HxCDF | 0.007 | 0.011 | 0.004 | 0.003 |
| 1,2,3,6,7,8-HxCDF | 0.007 | 0.011 | 0.004 | 0.003 |
| 2,3,4,6,7,8-HxCDF | 0.007 | 0.011 | 0.004 | 0.003 |
| 1,2,3,7,8,9-HxCDF | 0.014 | 0.023 | 0.009 | 0.005 |
| 1,2,3,4,6,7,8-HpCDF | 0.011 | 0.045 | 0.013 | 0.370 |
| 1,2,3,4,7,8,9-HpCDF | 0.013 | 0.057 | 0.026 | 0.215 |
| OCDF | 0.009 | 0.222 | 0.324 | 7.732 |
| 18 | 0.021 | 0.008 | 0.048 | 0.000 |
| 31 | 0.013 | 0.012 | 0.134 | 0.016 |
| 28 | 0.041 | 0.026 | 0.318 | 0.059 |
| 37 | 0.000 | 0.000 | 0.000 | 0.000 |
| 51 | 0.000 | 0.000 | 0.000 | 0.000 |
| 52 | 0.013 | 0.014 | 0.443 | 0.061 |
| 49 | 0.000 | 0.004 | 0.121 | 0.018 |
| 47 | 0.000 | 0.000 | 0.085 | 0.026 |
| 81 | 0.000 | 0.000 | 0.000 | 0.000 |
| 77 | 0.001 | 0.001 | 0.002 | 0.001 |
| 101 | 0.009 | 0.015 | 0.277 | 0.034 |
| 99 | 0.002 | 0.002 | 0.063 | 0.028 |
| 123 | 0.000 | 0.000 | 0.000 | 0.001 |
| 118 | 0.018 | 0.004 | 0.117 | 0.083 |
| 114 | 0.000 | 0.004 | 0.000 | 0.000 |
| 105 | 0.000 | 0.000 | 0.026 | 0.023 |
| 126 | 0.000 | 0.000 | 0.000 | 0.000 |
| 147 | 0.000 | 0.000 | 0.000 | 0.000 |
| 153 | 0.021 | 0.008 | 0.235 | 0.242 |
| 138 | 0.021 | 0.008 | 0.199 | 0.235 |
| 128+167 | 0.000 | 0.000 | 0.004 | 0.005 |
| 156 | 0.000 | 0.000 | 0.000 | 0.002 |
| 157 | 0.000 | 0.000 | 0.000 | 0.000 |
| 169 | 0.000 | 0.000 | 0.000 | 0.000 |
| 180 | 0.013 | 0.000 | 0.083 | 0.126 |
| 189 | 0.000 | 0.000 | 0.000 | 0.000 |
| PCB | 0.174 | 0.110 | 2.156 | 0.962 |

IND = intake normal diet; ILDD = intake vegan diet; END = excretion normal diet; ELDD = excretion vegan diet

**Comparison of Dietary Intake and Excretion (ng/d for PCDD/Fs; g/d for PCBs) both Trials (Subject 4, Older Group)**

| Congener | **IND** | **ILDD** | **END** | **ELDD** |
| --- | --- | --- | --- | --- |
| 2,3,7,8-TCDD | 0.005 | 0.003 | 0.004 | 0.015 |
| 1,2,3,7,8-PeCDD | 0.006 | 0.003 | 0.018 | 0.044 |
| 1,2,3,6,7,8-HxCDD | 0.004 | 0.003 | 0.053 | 0.147 |
| 1,2,3,4,7,8-HxCDD | 0.004 | 0.003 | 0.015 | 0.004 |
| 1,2,3,7,8,9-HxCDD | 0.004 | 0.003 | 0.053 | 0.004 |
| 1,2,3,4,6,7,8-HpCDD | 0.119 | 0.049 | 0.258 | 0.441 |
| OCDD | 0.583 | 0.392 | 1.845 | 4.413 |
| 2,3,7,8-TCDF | 0.005 | 0.009 | 0.003 | 0.013 |
| 1,2,3,7,8-PeCDF | 0.004 | 0.003 | 0.003 | 0.004 |
| 2,3,4,7,8-PeCDF | 0.004 | 0.003 | 0.024 | 0.066 |
| 1,2,3,4,7,8-HxCDF | 0.005 | 0.003 | 0.010 | 0.003 |
| 1,2,3,6,7,8-HxCDF | 0.005 | 0.003 | 0.009 | 0.003 |
| 2,3,4,6,7,8-HxCDF | 0.005 | 0.003 | 0.012 | 0.003 |
| 1,2,3,7,8,9-HxCDF | 0.009 | 0.006 | 0.004 | 0.006 |
| 1,2,3,4,6,7,8-HpCDF | 0.008 | 0.043 | 0.062 | 0.154 |
| 1,2,3,4,7,8,9-HpCDF | 0.010 | 0.009 | 0.001 | 0.007 |
| OCDF | 0.143 | 0.105 | 0.078 | 1.692 |
| 18 | 0.329 | 0.014 | 0.049 | 0.005 |
| 31 | 0.305 | 0.010 | 0.030 | 0.022 |
| 28 | 0.922 | 0.024 | 0.074 | 0.083 |
| 37 | 0.000 | 0.000 | 0.000 | 0.000 |
| 51 | 0.078 | 0.000 | 0.000 | 0.000 |
| 52 | 0.472 | 0.012 | 0.041 | 0.062 |
| 49 | 0.122 | 0.000 | 0.012 | 0.018 |
| 47 | 0.015 | 0.000 | 0.009 | 0.019 |
| 81 | 0.000 | 0.000 | 0.000 | 0.000 |
| 77 | 0.003 | 0.000 | 0.000 | 0.001 |
| 101 | 0.181 | 0.012 | 0.057 | 0.031 |
| 99 | 0.026 | 0.000 | 0.016 | 0.017 |
| 123 | 0.000 | 0.000 | 0.000 | 0.000 |
| 118 | 0.040 | 0.002 | 0.043 | 0.035 |
| 114 | 0.000 | 0.000 | 0.000 | 0.000 |
| 105 | 0.005 | 0.000 | 0.012 | 0.008 |
| 126 | 0.000 | 0.000 | 0.000 | 0.000 |
| 147 | 0.000 | 0.000 | 0.000 | 0.000 |
| 153 | 0.037 | 0.005 | 0.139 | 0.184 |
| 138 | 0.033 | 0.003 | 0.110 | 0.131 |
| 128+167 | 0.000 | 0.000 | 0.003 | 0.002 |
| 156 | 0.000 | 0.000 | 0.000 | 0.000 |
| 157 | 0.000 | 0.000 | 0.000 | 0.000 |
| 169 | 0.000 | 0.000 | 0.000 | 0.000 |
| 180 | 0.015 | 0.000 | 0.077 | 0.064 |
| 189 | 0.004 | 0.000 | 0.014 | 0.000 |
| PCB | 2.587 | 0.084 | 0.686 | 0.682 |

IND = intake normal diet; ILDD = intake vegan diet; END = excretion normal diet; ELDD = excretion vegan diet

**Comparison of Dietary Intake and Excretion (ng/d for PCDD/Fs; g/d for PCBs) both Trials (Subject 3, Older Group)**

| Congener | **IND** | **ILDD** | **END** | **ELDD** |
| --- | --- | --- | --- | --- |
| 2,3,7,8-TCDD | 0.004 | 0.003 | 0.001 | 0.004 |
| 1,2,3,7,8-PeCDD | 0.004 | 0.002 | 0.003 | 0.013 |
| 1,2,3,6,7,8-HxCDD | 0.003 | 0.002 | 0.027 | 0.063 |
| 1,2,3,4,7,8-HxCDD | 0.003 | 0.002 | 0.004 | 0.008 |
| 1,2,3,7,8,9-HxCDD | 0.003 | 0.002 | 0.004 | 0.003 |
| 1,2,3,4,6,7,8-HpCDD | 0.059 | 0.033 | 0.018 | 0.026 |
| OCDD | 0.629 | 0.221 | 0.498 | 0.521 |
| 2,3,7,8-TCDF | 0.005 | 0.003 | 0.000 | 0.001 |
| 1,2,3,7,8-PeCDF | 0.004 | 0.003 | 0.001 | 0.001 |
| 2,3,4,7,8-PeCDF | 0.004 | 0.003 | 0.006 | 0.017 |
| 1,2,3,4,7,8-HxCDF | 0.004 | 0.003 | 0.000 | 0.002 |
| 1,2,3,6,7,8-HxCDF | 0.004 | 0.003 | 0.003 | 0.002 |
| 2,3,4,6,7,8-HxCDF | 0.004 | 0.003 | 0.000 | 0.002 |
| 1,2,3,7,8,9-HxCDF | 0.008 | 0.005 | 0.000 | 0.004 |
| 1,2,3,4,6,7,8-HpCDF | 0.094 | 0.033 | 0.005 | 0.067 |
| 1,2,3,4,7,8,9-HpCDF | 0.009 | 0.007 | 0.001 | 0.010 |
| OCDF | 0.075 | 0.037 | 0.034 | 1.217 |
| 18 | 0.273 | 0.010 | 0.001 | 0.000 |
| 31 | 0.226 | 0.006 | 0.006 | 0.001 |
| 28 | 0.479 | 0.014 | 0.015 | 0.004 |
| 37 | 0.000 | 0.000 | 0.000 | 0.000 |
| 51 | 0.038 | 0.000 | 0.000 | 0.000 |
| 52 | 0.265 | 0.010 | 0.008 | 0.021 |
| 49 | 0.066 | 0.003 | 0.002 | 0.006 |
| 47 | 0.010 | 0.000 | 0.002 | 0.007 |
| 81 | 0.000 | 0.000 | 0.000 | 0.000 |
| 77 | 0.002 | 0.001 | 0.000 | 0.000 |
| 101 | 0.116 | 0.011 | 0.011 | 0.005 |
| 99 | 0.008 | 0.001 | 0.007 | 0.008 |
| 123 | 0.000 | 0.000 | 0.000 | 0.000 |
| 118 | 0.016 | 0.002 | 0.061 | 0.011 |
| 114 | 0.000 | 0.002 | 0.001 | 0.000 |
| 105 | 0.000 | 0.000 | 0.013 | 0.002 |
| 126 | 0.001 | 0.000 | 0.000 | 0.000 |
| 147 | 0.000 | 0.000 | 0.000 | 0.000 |
| 153 | 0.011 | 0.010 | 0.090 | 0.111 |
| 138 | 0.012 | 0.008 | 0.074 | 0.090 |
| 128+167 | 0.000 | 0.000 | 0.001 | 0.001 |
| 156 | 0.000 | 0.000 | 0.000 | 0.000 |
| 157 | 0.000 | 0.000 | 0.000 | 0.000 |
| 169 | 0.000 | 0.000 | 0.000 | 0.000 |
| 180 | 0.000 | 0.005 | 0.000 | 0.041 |
| 189 | 0.000 | 0.000 | 0.000 | 0.000 |
| PCB | 1.525 | 0.083 | 0.293 | 0.309 |

IND = intake normal diet; ILDD = intake vegan diet; END = excretion normal diet; ELDD = excretion vegan diet

**Comparison of Dietary Intake and Excretion (ng/d for PCDD/Fs; g/d for PCBs) both Trials (Subject 1, Older Group)**

| Congener | **IND** | **ILDD** | **END** | **ELDD** |
| --- | --- | --- | --- | --- |
| 2,3,7,8-TCDD | 0.002 | 0.003 | 0.002 | 0.007 |
| 1,2,3,7,8-PeCDD | 0.003 | 0.003 | 0.000 | 0.012 |
| 1,2,3,6,7,8-HxCDD | 0.036 | 0.003 | 0.029 | 0.052 |
| 1,2,3,4,7,8-HxCDD | 0.002 | 0.003 | 0.003 | 0.005 |
| 1,2,3,7,8,9-HxCDD | 0.002 | 0.003 | 0.006 | 0.005 |
| 1,2,3,4,6,7,8-HpCDD | 0.084 | 0.042 | 0.051 | 0.107 |
| OCDD | 0.724 | 0.508 | 0.654 | 1.917 |
| 2,3,7,8-TCDF | 0.003 | 0.007 | 0.002 | 0.002 |
| 1,2,3,7,8-PeCDF | 0.003 | 0.003 | 0.001 | 0.002 |
| 2,3,4,7,8-PeCDF | 0.003 | 0.003 | 0.007 | 0.021 |
| 1,2,3,4,7,8-HxCDF | 0.018 | 0.003 | 0.002 | 0.003 |
| 1,2,3,6,7,8-HxCDF | 0.003 | 0.003 | 0.002 | 0.003 |
| 2,3,4,6,7,8-HxCDF | 0.003 | 0.003 | 0.002 | 0.003 |
| 1,2,3,7,8,9-HxCDF | 0.006 | 0.006 | 0.004 | 0.006 |
| 1,2,3,4,6,7,8-HpCDF | 0.117 | 0.040 | 0.004 | 1.481 |
| 1,2,3,4,7,8,9-HpCDF | 0.008 | 0.010 | 0.008 | 0.160 |
| OCDF | 0.084 | 0.055 | 0.266 | 49.372 |
| 18 | 0.046 | 0.018 | 0.148 | 0.014 |
| 31 | 0.044 | 0.010 | 0.329 | 0.047 |
| 28 | 0.093 | 0.021 | 0.701 | 0.119 |
| 37 | 0.000 | 0.000 | 0.000 | 0.000 |
| 51 | 0.000 | 0.000 | 0.000 | 0.000 |
| 52 | 0.043 | 0.014 | 0.865 | 0.223 |
| 49 | 0.009 | 0.001 | 0.241 | 0.062 |
| 47 | 0.000 | 0.000 | 0.162 | 0.047 |
| 81 | 0.000 | 0.000 | 0.000 | 0.000 |
| 77 | 0.001 | 0.001 | 0.002 | 0.000 |
| 101 | 0.013 | 0.023 | 0.262 | 0.057 |
| 99 | 0.004 | 0.000 | 0.046 | 0.015 |
| 123 | 0.000 | 0.000 | 0.000 | 0.001 |
| 118 | 0.014 | 0.007 | 0.008 | 0.028 |
| 114 | 0.000 | 0.000 | 0.000 | 0.001 |
| 105 | 0.000 | 0.000 | 0.002 | 0.004 |
| 126 | 0.000 | 0.000 | 0.000 | 0.000 |
| 147 | 0.000 | 0.000 | 0.000 | 0.000 |
| 153 | 0.022 | 0.023 | 0.104 | 0.081 |
| 138 | 0.023 | 0.025 | 0.086 | 0.063 |
| 128+167 | 0.000 | 0.000 | 0.002 | 0.001 |
| 156 | 0.000 | 0.000 | 0.000 | 0.000 |
| 157 | 0.000 | 0.000 | 0.000 | 0.000 |
| 169 | 0.000 | 0.000 | 0.000 | 0.000 |
| 180 | 0.007 | 0.014 | 0.030 | 0.016 |
| 189 | 0.000 | 0.000 | 0.000 | 0.000 |
| PCB | 0.321 | 0.159 | 2.991 | 0.780 |

IND = intake normal diet; ILDD = intake vegan diet; END = excretion normal diet; ELDD = excretion vegan diet
